# Supplementary material for: Two polyaminophenolic fluorescent chemosensors for H+and Zn(ii). Spectroscopic behaviour of free ligands and of their dinuclear Zn(ii) complexes
Source: Royal Society of Chemistry journal article supplement (doi:10.1039/b810228g), 2008-11-03
Supplement: b810228g.pdf [file b810228g.pdf]

## Two polyaminophenolic fluorescent chemosensors for $H^+$ and $Zn(II)$ . Spectroscopic behaviour of free ligands and of their dinuclear $Zn(II)$ complexes

Gianluca Ambrosi, Cristina Battelli, Mauro Formica, Vieri Fusi,\* Luca Giorgi, Eleonora Macedi,  
Mauro Micheloni,\* Roberto Pontellini and Luca Prodi

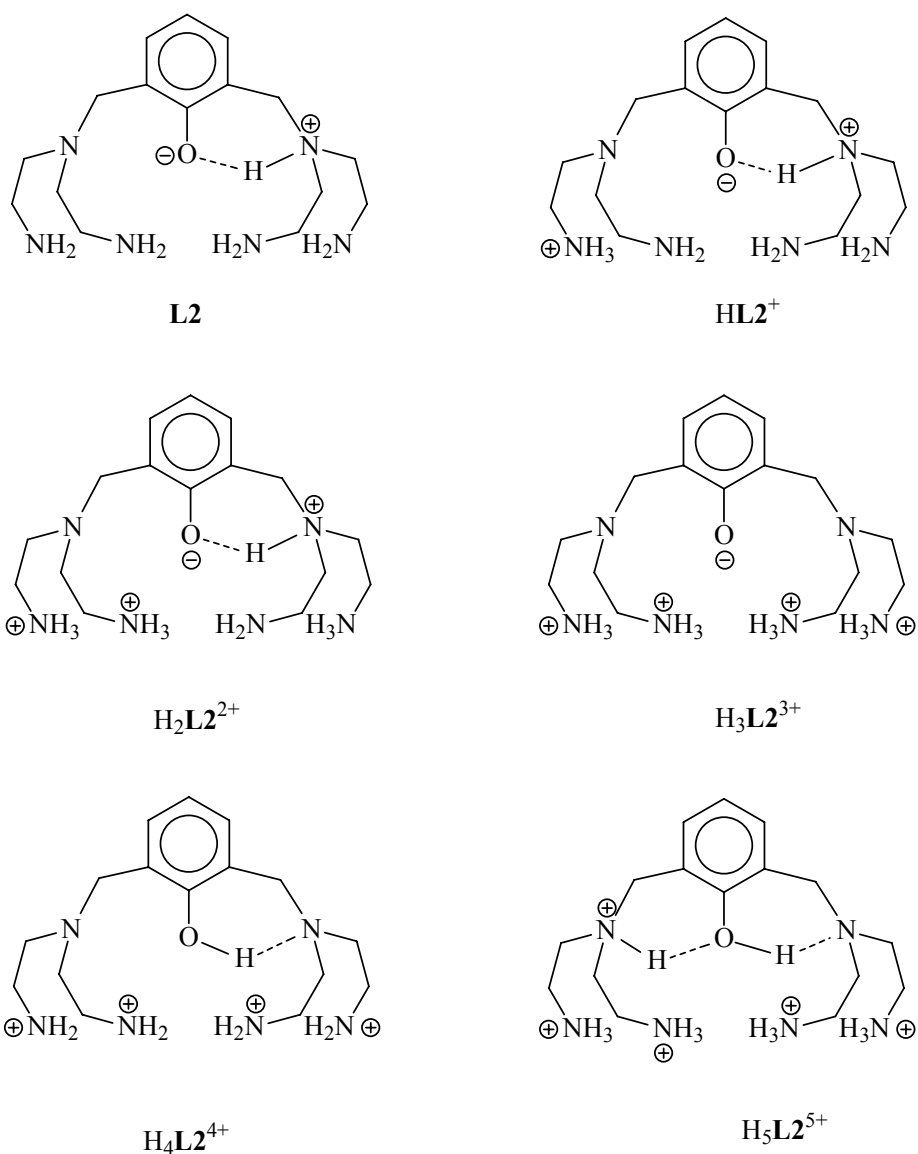

Figure S1 Location of acidic hydrogen atoms in the protonated species of **L2**
